# Supplementary material
Source: publisher site journal article supplement (https://www.degruyterbrill.com/publication/journal_key/MEDGEN/downloadAsset/MEDGEN_Instructions%20for%20Authors--en.pdf)
Supplement: Supplementary file 1 [file MEDGEN_Instructions%20for%20Authors--en.pdf]

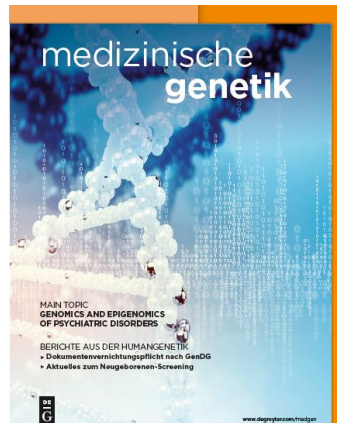

# medizinische genetik

## Instructions for Authors

## Reviews + Articles on key topics

### 1. Journal *medizinischegenetik* – Profile

The journal *medizinischegenetik* serves education and training among colleagues, the interdisciplinary exchange of knowledge in all areas of human genetics in clinics, practice, research and teaching. Each issue of the quarterly journal deals with a focus that provides a comprehensive overview of current developments in specific clinical pictures, technical developments and therapeutic approaches. All reviews are written in English language. The journal thus creates a platform for the international exchange of knowledge and increased awareness of German research activities in the scientific community. In addition, *medizinischegenetik* contains information on activities in its own subject in the German-language section. This includes conference reports, association announcements, personnel matters, statements and guidelines. With health policy questions, historical retrospectives and comments on current developments, the profession takes a stand on human genetic issues in Germany, Austria and Switzerland. Übersichten und Leitthemenbeiträge

### 2. Reviews and articles on key topics

Reviews and articles on key topics offer the reader a critical compilation and discussion of relevant scientific results. In addition to providing background knowledge, the focus is on the evaluation and formulation of recommendations for action. Furthermore, current developments can be discussed here. Each issue of *medizinischegenetik* is dedicated to a main topic, which is supervised by scientific coordinators. They invite renowned authors to write overviews and report on their projects and research results. Experiences and examples from practice complete the presentations.

### 3. Peer-Review

Before publication, all articles are reviewed by at least two independent, renowned reviewers, who are selected by the editors. All submissions are subjected to a rapid, simple-blind peer review process. Authors and scientific coordinators have the opportunity to indicate the names of potential reviewers they wish to propose or exclude from the review process.

### 4. Turnaround times

The editorship of *medizinischegenetik* aims at informing the authors about the result of the peer review within 4 weeks starting from submission. The revised manuscripts should be submitted by the authors within approximately 1 week. Accepted manuscripts will be published online (ahead of print) about 3 - 4 weeks after acceptance.

### 5. Ethical conduct of research

Authors declare with their submission that the contribution has not been published to date, except as an abstract, doctoral thesis or lecture and is not intended for publication in another journal. Furthermore, they declare that all co-authors agree with the content of the paper and that the institution in which the paper was carried out agrees with the paper, either tacitly or explicitly.

### CrossCheck

We ask for your understanding that all submitted contributions will be checked by the plagiarism detection software CrossCheck from "iThenticate" to exclude potential overlaps with already published

contributions. For more information on intellectual property theft in science, please visit **COPE Committee on Publication Ethics**. All previously published material must be properly identified in the manuscript.

### Conflicts of interests

Any source of research funding that supported the work on the submission must be cited. A description of how the work was funded must also be provided (including funding labels/grant numbers, if possible). The electronic submission must also state whether there is a conflict of interest, whether financial support has been provided, whether there is an employment relationship, study support or fees for lectures. A corresponding declaration must also be made within the article (before the list of literature). Even if there is no conflict of interest, this must be explicitly stated. A conflict of interest with regard to a manuscript always exists if a participant in the review and publication process - author, reviewer and editor - has relationships that influence his or her evaluation in an inappropriate manner, regardless of whether the evaluation is actually influenced. Financial relationships with industry (e.g., employment, consulting, equity, fee or expert witness), either directly or through direct family relationships, are usually considered the most significant conflicts of interest. However, conflicts can also have other causes, such as study grants or other third-party funding, connections to health insurance companies, politics or other interest groups, personal relationships or academic/intellectual competition. Authors may, if appropriate, provide details of individual contributions to the submitted work. All authors must declare **that they take full responsibility for the entire content and submission of the manuscript**.

### Informed consent

The protection of privacy is a legal right that must not be infringed without individual informed consent. In cases where the identification of personal information is necessary for scientific reasons, authors should obtain full documentation of informed consent, including written permission from the patient or their legal guardians prior to inclusion in the study.

### Authorization for the use of human subjects

Manuscripts containing information related to human use should clearly state that the research complies with all relevant national regulations and institutional policies and has been approved by the authors' institutional review board or any equivalent committee. Copies of the guidelines and policy statements must be available for review by the Managing Editor if necessary. The editors reserve the right to seek additional information or guidance from reviewers on any cases in which concerns arise. All investigations with human subjects must have been conducted by following the tenets of the Declaration of Helsinki, what is more authors must identify the committee or review board approving the experiments, and provide a statement indicating approval of the research.

### Declarations

The below mentioned statements are to be customized and included before the reference section of reviews. Please adjust this text to your submission (e.g. Research funding: Please make your declaration or write „None declared.“).

**Declarations on research funding, author contributions and competing interests are mandatory for submission.** Declarations of informed consent and ethical approval are mandatory if the use of human study participants or the identification of personal information was necessary for scientific reasons. Otherwise please state “not applicable”.

| Reviews              |                                                                                                                                                                                                                                                                                              |
|----------------------|----------------------------------------------------------------------------------------------------------------------------------------------------------------------------------------------------------------------------------------------------------------------------------------------|
| Research funding     | Declaration / None declared.                                                                                                                                                                                                                                                                 |
| Author contributions | All authors have accepted responsibility for the entire content of this manuscript and approved its submission.                                                                                                                                                                              |
| Competing interests  | Declaration / Authors state no conflict of interest.                                                                                                                                                                                                                                         |
| Informed consent     | Informed consent was obtained from all individuals included in this study.                                                                                                                                                                                                                   |
| Ethical approval     | The research related to human use complied with all the relevant national regulations, institutional policies, is in accordance the tenets of the Helsinki Declaration, and has been approved by the authors' institutional review board or equivalent committee ( <b>approval number</b> ). |

## 6. Copyright

By sending the manuscript to the publisher, the author assures that his contribution as well as the external text and image originals procured by himself do not infringe any rights of third parties, that he alone is authorized to dispose of the existing copyrighted rights of use. During the term of the contract, the author will refrain from any other copying and distribution or incorporeal transmission and reproduction of the contribution (e.g. also on the Internet). The author shall transfer to the publisher the exclusive right of reproduction and distribution (publishing right) for the duration of the statutory copyright without any spatial restrictions, namely without limitation of quantity, the right of incorporeal reproduction of the work, the right to make the work accessible to anyone for individual retrieval and the right to grant licenses to third parties in Germany and abroad to exercise the ancillary rights transferred. The publisher is authorized but not obligated to exploit the rights of use to which it is entitled.

## 7. Checklist: Preparation of manuscripts

|                                                                                                                                              |
|----------------------------------------------------------------------------------------------------------------------------------------------|
| • Please write the manuscript in English                                                                                                     |
| • Please always send text as open file (docx)                                                                                                |
| • Complete address of the author of correspondence with tel. no., fax, e-mail                                                                |
| • Total length: max. 25,000 characters including spaces (including literature, summary and keywords)                                         |
| • Short, concise title of the article, possibly an explanatory subtitle                                                                      |
| • English title, English abstract (max. <b>800</b> characters), 5 keywords                                                                   |
| • On the Content:                                                                                                                            |
| ○ Short introduction to the topic                                                                                                            |
| ○ Concise and as short as possible subheadings, 4 hierarchies are possible                                                                   |
| ○ Conclusion / Summary / Outlook                                                                                                             |
| • Mention a <b>max. of 4</b> figures <b>or 4</b> tables chronologically in the text; if necessary, create a list of abbreviations / glossary |
| • <b>Max. 30</b> literature quotations → see reference list below                                                                            |

## 8. Submissions of manuscripts

Manuscripts can only be submitted online to:

Dr. Christine Scholz  
GfH-Redaktion Zeitschrift medizinische Genetik  
Inselkammerstr. 2  
82008 München-Unterhaching  
Tel 089-55 02 78 55  
Fax 089-55 02 78 56  
redaktion@medgenetik.de

## 9. Text layout

### Reference list

For bibliographical references, please always provide the complete, detailed bibliographic information. Therefore the names of all authors are always listed. The names of the authors appear as follows: Last name, spaces, up to 2 initials. The names are followed by the year of publication, title and, if applicable, the journal year, colon and page numbers. English titles are to be written in lower case except for the first letter of the first word and the words which are usually capitalized in British English.

|                                         |                                                                                                                                                                                                                                                                                    |
|-----------------------------------------|------------------------------------------------------------------------------------------------------------------------------------------------------------------------------------------------------------------------------------------------------------------------------------|
| <b>Journal articles:</b>                | Dean C, Kendell RE (1981) The symptomatology of puerperal illnesses. <i>British Journal of Psychiatry</i> 139:128–133.                                                                                                                                                             |
| <b>Books and monographs:</b>            | Klein C, Bert H, Balck F (Hg.) (2011) <i>Gesundheit – Religion – Spiritualität. Konzepte, Befunde und Erklärungsansätze</i> . Weinheim: Juventa.                                                                                                                                   |
| <b>Contributory work:</b>               | Exline JJ, Rose E. (2005) Religious and spiritual struggles. In: Paloutzian RF, Park CL (Hg.) <i>Handbook of the psychology of religion and spirituality</i> . New York: Guilford. 315–330.                                                                                        |
| <b>Electronic publications:</b>         | Willer H et al.: Ökolandbau in Deutschland (online). Bad Dürkheim: Stiftung Ökologie & Landbau, 22.06.2003 (Zitierdatum: 01.08.2003), abrufbar unter <a href="http://www.soel.de/oe-koelandbau/deutschland_ueber.html">http://www.soel.de/oe-koelandbau/deutschland_ueber.html</a> |
| <b>Article ahead of print:</b>          | Loetz C, Müller J, Petersen Y, Mauer C (2013) Attachment theory and Spiritual Care: two threads converging in Palliative Care? <i>Evidence-Based Complementary and Alternative Medicine</i> . doi:10.1155/2013/740291. [Epub ahead of print].                                      |
| <b>Article in online-only journals:</b> | Büssing A, Hedtstück A, Khalsa SB, Ostermann T, Heusser P (2012) Development of specific aspects of spirituality during a 6-Month intensive Yoga practice. <i>Evidence-based Complementary and Alternative Medicine</i> . doi.org/10.1155/2012/981523. [Epub].                     |

## Tables

Number tables consecutively using Arabic numerals. Provide a short descriptive title, column headings, and (if necessary) footnotes to make each table self-explanatory. In the footnote, refer to information within the table with superscript lowercase letters, and do not use special characters or numbers. Separate units with a comma and use parentheses or square brackets for additional measures (e.g., %, range, etc). Refer to tables in the text as Table 1, etc. use Table 1 (boldface), etc. in the title of the table.

## Figures

**General requirements:** All illustrations must be of reproduction-ready quality. They will be reduced in size to fit, whenever possible, the width of a single column. Lettering of all figures within the article should be uniform in style (preferably a sans serif typeface like Helvetica) and of sufficient size (ca. 10 pt.). Uppercase letters A, B, C, etc. should be used to identify parts of multi-part figures. In the legend, these letters are included in parentheses. Cite all figures in the text in numerical order. Please insert tables, figures and other illustrations in the text, and also upload them separately as high-resolution TIFF or JPEG files. Please remember to obtain the copyright for the use of figures (print and online) yourself.

**Halftone figures and line drawings:** Figures should have a minimum resolution of 300 dpi (halftone figures) and 1200 dpi (line drawings) and be of good contrast. Faint shading may be lost upon reproduction. When drawing bar graphs, use patterning instead of greyscales.

**Color plates:** Authors are encouraged to submit illustrations in color if necessary for the scientific content of their work. Publication of color figures is provided free of charge both in online and print editions.

**Figure legends:** Provide a short descriptive title and a legend, either below the figure, in the main text, or on separate pages, to make each figure self-explanatory. Explain all symbols used in a figure. Remember to use the same abbreviations as in the text body.

**Videos:** Authors are encouraged to submit videos accompanying the article as supplemental material.

**Supplements:** You may submit supplemental material, i.e. additional tables, figures, videos, appendices or other additional material (e.g. references) that exceeds the limitation of the article and/or illustrates the contents of your article. Supplemental material should be uploaded as separate file(s) during submission. Within the text, supplemental material must be cited consecutively and be referred to as supplemental material (e.g. see Supplemental Material, Figure 1, or Supplemental Figure 1). Supplemental material is subject to peer review as part of the manuscript. If the manuscript is accepted and the supplemental material is posted online, it will be referenced in the article of the printed version together with the URL where it can be found.

## 10. Nomenclature

Follow the rules of the IUPAC-IUB Commission on Biochemical Nomenclature, as indicated in IUB Biochemical Nomenclature and Related Documents.

## 11. Permissions

It is the authors' responsibility to obtain permission to reproduce original or modified material that has been previously published elsewhere.

## 12. Accepted manuscripts

**Proofs:** The editorship of *medizinischegenetik* will inform the corresponding author of the manuscript decision. Accepted manuscripts must be provided in a Word document containing the final text for typesetting. The corresponding author of an article will receive the proofs in electronic form to check for editing and type-setting accuracy. The final, accepted version of the manuscript must adhere to the above guidelines. Please check the final file of the article carefully because spelling mistakes, inconsistencies and errors will be faithfully translated into the typeset version.

Major changes to the article after acceptance will not be considered without undergoing additional peer review and will cause extra costs.

**Open Access Policy:** Upon acceptance of your manuscript it will be published open access on De Gruyter Online. The costs (Article Processing Charges (APCs)) are covered by the editorship. For more information on De Gruyter's Open Access policies, please visit <http://www.degruyter.com/dg/page/577/open-access-policy>

### Contact for further questions

Dr. Christine Scholz  
GfH-Editorship *medizinischegenetik*

redaktion@medgenetik.de
